# Supplementary material
Source: MDPI journal article supplement (https://www.mdpi.com/2075-163X/7/6/100)
Supplement: s1 [file s1]

## Argon Geochronology Data and Analytical Methods

### **$^{40}\text{Ar}/^{39}\text{Ar}$ METHODS AND AGE CALCULATIONS**

All isotopic data were measured with a MAP-215-50 mass spectrometer equipped with a Johnston electron multiplier. The multiplier is operated at about 2.2 kV and yields a gain above the faraday collector of about 7000. Typical sensitivity values were  $2.5\text{e-}16$  mol/pA and  $1.0\text{e-}16$  mol/pA for the furnace and laser systems, respectively. Resolution at 5% peak-height at mass 40 was typically 600. Details regarding blanks and background, irradiation interference corrections, reactor information and summarized gas-handling procedures are provided in Table 1 within the manuscript. All isotopic data are given here Table 1. Additional information about the New Mexico Geochronology Research Laboratory can be found within New Bureau of Geology and Mineral Resources open file report OF-AR-1 at <http://geoinfo.nmt.edu/publications/openfile/argon/home.html>.

Furnace Step-Heating: All samples were step-heated in a double vacuum Mo resistance furnace. Heating times varied depending upon mineral composition but typically were 8 to 10 minutes. Sample JM-Coarse K-feldspar had highly variable heating times (10-120 minutes) that were designed to maximize recovery of the diffusion coefficients and to resolve excess argon contamination by performing isothermal replicate-heating steps. All samples were gettered during heating using a SAES GP-50 getter operated at  $\sim 450^\circ\text{C}$ . Following heating, gas was expanded to a second-stage of the

extraction line were it was reacted with 2 GP-50 getters (one at 20°C, one at ~450°C) and a W filament operated at about 2000°C. Typical K-feldspar gettering time in the second stage was 2-4 minutes, whereas micas and clays were gettered for 4 to 8 minutes. The furnace thermocouple was calibrated by melting copper foil and typically the recorded temperature underestimated the sample temperature by 40-100°C. For the K-feldspar data, correction of thermocouple temperature to the Cu foil melting point was done on a sample-by-sample basis and the reported temperature in the data table is calibrated to the foil melting. Estimated accuracy of the heating temperature is  $\pm 15^\circ\text{C}$  for any given step. For the mica and clay data, the thermocouple-recorded temperature is reported.

In vacuo encapsulation: Two clay samples (NB-20, NB-087) were wrapped in copper foil and placed within a quartz vacuum manifold to be sealed under vacuum prior to irradiation. Samples were pumped overnight with a Varian V-70 turbo pump to about  $10^{-7}$  Torr prior to sealing. The quartz vials were 6 mm OD and 4 mm ID and were sealed while being pumped on by melting and detaching the vial from the manifold with a torch. The final encapsulation vial was about 4 cm long and care was taken not to heat the sample during heating with the torch. The vials were irradiated at the University of Michigan Ford reactor where the sample temperatures were estimated to have not exceed  $50^\circ\text{C}$ . Following irradiation, the vials were loaded into the  $\text{CO}_2$  laser sample chamber and pumped down overnight without baking. After pump-down the  $\text{CO}_2$  laser was used to melt a hole in the encapsulation vial for quantitative measurement of any argon within the vial. Following gettering for 10 minutes, the gas was exposed to a liquid nitrogen cooled activated charcoal finger where heavy noble gases could be collected. After 10

minutes the extraction line was pumped with a turbo pump to remove the  $^4\text{He}$  that was not trapped on the charcoal finger. This was done because substantial  $^4\text{He}$  is created during irradiation of the quartz vial and this high  $^4\text{He}$  pressure compromises the mass spectrometer's ability to accurately measure the argon isotopes. Following pumping the extraction line clean of  $^4\text{He}$ , the charcoal finger was warmed to room temperature and the argon contained within the encapsulation ampoule was analyzed by our standard mass spectrometry methods. Following this, the encapsulated samples were removed from the vials and loaded into the furnace for step heating. Relative volumes of the furnace system and  $\text{CO}_2$  laser systems were determined such that all heating steps and the trapped encapsulation gas could be normalized to a uniform value. Evidence that the encapsulated samples were not heated during sealing or irradiation is the lack of measurable radiogenic argon in the encapsulation vials.

Irradiations, Flux monitoring and age calculations:

All irradiations were performed at the University of Michigan Ford reactor (position L-67). The irradiations were 24 to 100 hours and all samples were irradiated within an evacuated quartz container. See above for encapsulation experiments.

Fluence gradients were monitored with Fish Canyon (FC-2) sanidine. Typically fusing 4 crystals from each location monitored 3 to 4 locations within individual sample trays. A sine curve was fit to the mean value of each location and J-factors were determined for the unknowns based on their geometry and the calculated curve. J-factor errors are estimated at 0.1% ( $1\sigma$ ) for most samples and 2% for the two encapsulated samples. Correction factors for interfering reactions were measured with K-glass and  $\text{CaF}_2$ . Typically 4 to 5 grains of each were fused with the  $\text{CO}_2$  laser to obtain a weighted mean value for each correction factor.

Reported ages for step-heated samples are weighed by the inverse variance for the indicated steps. MSWD values are calculated for each weighted mean and errors are determined using the method of Taylor (1982). If the MSWD value is greater than 1, the error is multiplied by the square root of the MSWD. Most of the igneous micas and K-feldspars yield significant parts of their spectra with several consecutive steps that have normally distributed age populations and thus have “true” plateau ages. Some samples returned slightly elevated MSWD values, however the weighted mean ages are still referred to as plateau ages. The overall climbing clay age spectra precluded determination of plateau ages and therefore only total gas ages are reported. Total gas

ages and errors were calculated by quadratically summing isotopic values from each heating step.

Monitor age and decay constants:

The assigned age of Fish Canyon sanidine is 27.84 Ma that is reported by Deino and Potts (1990) relative to Minnesota hornblende (MMhb-1) at 520.4 Ma (Samson and Alexander, 1987). Decay constants and isotopic abundances are those recommended by Steiger and Jäger (1977).

#### References Cited:

- Deino A, Potts R (1990) Single-Crystal  $^{40}\text{Ar}/^{39}\text{Ar}$  dating of the Olorgesailie Formation, Southern Kenya Rift. *J. Geophys. Res.* 95: 8453-8470.
- Samson SD, Alexander EC Jr. (1987) Calibration of the interlaboratory  $^{40}\text{Ar}/^{39}\text{Ar}$  dating standard, Mmhb-1. *Chem. Geol.* 66: 27-34.
- Steiger RH, Jäger E (1977) Subcommittee on geochronology: Convention on the use of decay constants in geo- and cosmochemistry. *Earth and Planet. Sci. Lett.* 36: 359-362.
- Taylor JR (1982) *An Introduction to Error Analysis: The Study of Uncertainties in Physical Measurements*. Univ. Sci. Books, Mill Valley, Calif., 270 p.

Appendix D, Table 1. Argon isotopic data.

| ID                                                                                                    | Temp<br>(°C) | $^{40}\text{Ar}/^{39}\text{Ar}$ | $^{37}\text{Ar}/^{39}\text{Ar}$ | $^{36}\text{Ar}/^{39}\text{Ar}$<br>( $\times 10^{-3}$ ) | $^{39}\text{Ar}_k$<br>( $\times 10^{-15}$ mol) | K/Ca        | $^{40}\text{Ar}^*$<br>(%) | $^{39}\text{Ar}$<br>(%) | Age<br>(Ma) | $\pm 1\sigma$<br>(Ma) |
|-------------------------------------------------------------------------------------------------------|--------------|---------------------------------|---------------------------------|---------------------------------------------------------|------------------------------------------------|-------------|---------------------------|-------------------------|-------------|-----------------------|
| <b>Cortez Biotite, 0.93 mg, J=0.0034332, D=1.00719<math>\pm</math>0.00168, nm-64, Lab#=7709-01</b>    |              |                                 |                                 |                                                         |                                                |             |                           |                         |             |                       |
| # A                                                                                                   | 600          | 25.89                           | 0.0376                          | 82.27                                                   | 1.139                                          | 13.6        | 6.0                       | 1.9                     | 9.6         | 2.9                   |
| # B                                                                                                   | 750          | 9.400                           | 0.0166                          | 14.41                                                   | 5.38                                           | 30.8        | 54.6                      | 10.6                    | 31.42       | 0.61                  |
| C                                                                                                     | 850          | 7.385                           | 0.0097                          | 4.956                                                   | 8.85                                           | 52.4        | 80.1                      | 25.0                    | 36.16       | 0.34                  |
| D                                                                                                     | 920          | 7.090                           | 0.0081                          | 4.065                                                   | 7.49                                           | 63.3        | 83.0                      | 37.1                    | 35.96       | 0.37                  |
| E                                                                                                     | 1000         | 7.134                           | 0.0090                          | 4.324                                                   | 16.90                                          | 56.4        | 82.0                      | 64.6                    | 35.76       | 0.21                  |
| F                                                                                                     | 1075         | 6.454                           | 0.0073                          | 2.126                                                   | 16.58                                          | 70.0        | 90.2                      | 91.5                    | 35.58       | 0.19                  |
| G                                                                                                     | 1110         | 7.238                           | 0.0279                          | 3.968                                                   | 2.375                                          | 18.3        | 83.8                      | 95.4                    | 37.0        | 1.1                   |
| H                                                                                                     | 1180         | 9.782                           | 0.3271                          | 11.99                                                   | 0.901                                          | 1.6         | 64.0                      | 96.8                    | 38.2        | 2.8                   |
| I                                                                                                     | 1210         | 7.338                           | 0.4347                          | 3.830                                                   | 1.960                                          | 1.2         | 85.0                      | 100.0                   | 38.1        | 1.3                   |
| <b>TGA <math>\pm 1\sigma</math></b>                                                                   |              |                                 | n=9                             |                                                         | 61.6                                           | K2O=7.41 %  |                           |                         | 35.10       | 0.19                  |
| <b>Plateau <math>\pm 1\sigma</math></b>                                                               |              | steps C-I                       | n=7                             | MSWD=1.30                                               | 55.1                                           | 56.3        |                           | 89.4                    | 35.80       | 0.14                  |
| <b>Cortez K-feldspar, 0.88 mg, J=0.0034276, D=1.00719<math>\pm</math>0.00168, nm-64, Lab#=7705-01</b> |              |                                 |                                 |                                                         |                                                |             |                           |                         |             |                       |
| C                                                                                                     | 800          | 10.63                           | 0.0056                          | 16.45                                                   | 11.83                                          | 90.9        | 54.2                      | 8.2                     | 35.19       | 0.45                  |
| E                                                                                                     | 900          | 6.960                           | 0.0100                          | 7.218                                                   | 0.720                                          | 51.2        | 69.3                      | 8.7                     | 29.5        | 3.8                   |
| F                                                                                                     | 900          | 6.975                           | 0.0058                          | 4.620                                                   | 1.898                                          | 88.3        | 80.4                      | 10.0                    | 34.2        | 1.4                   |
| G                                                                                                     | 1000         | 6.217                           | 0.0044                          | 1.896                                                   | 3.766                                          | 116.3       | 91.0                      | 12.6                    | 34.50       | 0.73                  |
| H                                                                                                     | 1100         | 6.008                           | 0.0049                          | 1.031                                                   | 10.44                                          | 104.3       | 94.9                      | 19.9                    | 34.78       | 0.28                  |
| I                                                                                                     | 1200         | 6.028                           | 0.0049                          | 1.113                                                   | 20.71                                          | 104.7       | 94.5                      | 34.2                    | 34.75       | 0.17                  |
| J                                                                                                     | 1250         | 5.827                           | 0.0045                          | 0.3657                                                  | 21.86                                          | 112.3       | 98.1                      | 49.4                    | 34.87       | 0.15                  |
| K                                                                                                     | 1300         | 5.869                           | 0.0046                          | 0.4003                                                  | 21.03                                          | 110.3       | 98.0                      | 63.9                    | 35.06       | 0.16                  |
| L                                                                                                     | 1350         | 6.011                           | 0.0044                          | 0.7786                                                  | 12.61                                          | 115.1       | 96.2                      | 72.7                    | 35.25       | 0.24                  |
| M                                                                                                     | 1400         | 6.000                           | 0.0045                          | 0.7441                                                  | 14.03                                          | 114.3       | 96.3                      | 82.4                    | 35.24       | 0.22                  |
| N                                                                                                     | 1750         | 6.391                           | 0.0049                          | 2.338                                                   | 25.37                                          | 104.3       | 89.2                      | 100.0                   | 34.76       | 0.16                  |
| <b>TGA <math>\pm 1\sigma</math></b>                                                                   |              |                                 | n=11                            |                                                         | 144.3                                          | K2O=18.37 % |                           |                         | 34.91       | 0.12                  |
| <b>Plateau <math>\pm 1\sigma</math></b>                                                               |              | steps C-N                       | n=11                            | MSWD=1.02                                               | 144.3                                          | 107.1       |                           | 100.0                   | 34.932      | 0.077                 |

Appendix D, Table 1. Argon isotopic data.

| ID                                                                                                      | Temp<br>(°C) | $^{40}\text{Ar}/^{39}\text{Ar}$ | $^{37}\text{Ar}/^{39}\text{Ar}$ | $^{36}\text{Ar}/^{39}\text{Ar}$<br>( $\times 10^{-3}$ ) | $^{39}\text{Ar}_K$<br>( $\times 10^{-15}$ mol) | K/Ca  | $^{40}\text{Ar}^*$<br>(%) | $^{39}\text{Ar}$<br>(%) | Age<br>(Ma) | $\pm 1\sigma$<br>(Ma) |
|---------------------------------------------------------------------------------------------------------|--------------|---------------------------------|---------------------------------|---------------------------------------------------------|------------------------------------------------|-------|---------------------------|-------------------------|-------------|-----------------------|
| <b>JM-fine Biotite, 3.41 mg, J=0.0076919, D=1.00361<math>\pm</math>0.00157, NM-100, Lab#=9914-01</b>    |              |                                 |                                 |                                                         |                                                |       |                           |                         |             |                       |
| # A                                                                                                     | 650          | 9.180                           | 0.0171                          | 21.72                                                   | 14.76                                          | 29.9  | 29.9                      | 2.5                     | 37.56       | 0.97                  |
| # B                                                                                                     | 730          | 4.965                           | 0.0071                          | 6.569                                                   | 17.92                                          | 72.2  | 60.7                      | 5.6                     | 41.12       | 0.62                  |
| # C                                                                                                     | 800          | 3.351                           | 0.0017                          | 1.463                                                   | 45.7                                           | 293.6 | 87.0                      | 13.3                    | 39.69       | 0.24                  |
| # D                                                                                                     | 870          | 2.872                           | 0.0011                          | 0.3869                                                  | 63.0                                           | 482.9 | 96.0                      | 24.1                    | 37.50       | 0.17                  |
| E                                                                                                       | 950          | 2.724                           | 0.0009                          | 0.2206                                                  | 79.5                                           | 551.0 | 97.6                      | 37.6                    | 36.15       | 0.15                  |
| F                                                                                                       | 1000         | 2.766                           | 0.0009                          | 0.2928                                                  | 51.3                                           | 553.2 | 96.8                      | 46.3                    | 36.44       | 0.19                  |
| G                                                                                                       | 1075         | 2.749                           | 0.0010                          | 0.2833                                                  | 107.0                                          | 494.6 | 96.9                      | 64.5                    | 36.24       | 0.12                  |
| H                                                                                                       | 1250         | 2.753                           | 0.0030                          | 0.2893                                                  | 180.7                                          | 168.0 | 96.9                      | 95.3                    | 36.273      | 0.093                 |
| I                                                                                                       | 1350         | 3.207                           | 0.0119                          | 1.668                                                   | 27.87                                          | 42.9  | 84.5                      | 100.0                   | 36.91       | 0.36                  |
| <b>TGA <math>\pm 1\sigma</math></b>                                                                     |              |                                 | n=9                             |                                                         | 587.8                                          |       | K2O=8.61 %                |                         | 36.87       | 0.11                  |
| <b>Plateau <math>\pm 1\sigma</math></b>                                                                 |              | steps E-I                       | n=5                             | MSWD=1.12                                               | 446.4                                          | 351.0 |                           | 75.9                    | 36.28       | 0.07                  |
| <b>JM-fine K-feldspar, 9.73 mg, J=0.0076364, D=1.00361<math>\pm</math>0.00157, nm-100, Lab#=9915-01</b> |              |                                 |                                 |                                                         |                                                |       |                           |                         |             |                       |
| F                                                                                                       | 800          | 2.672                           | 0.0163                          | 0.3439                                                  | 19.95                                          | 31.2  | 96.2                      | 1.1                     | 34.72       | 0.13                  |
| G                                                                                                       | 900          | 2.611                           | 0.0067                          | 0.1484                                                  | 58.6                                           | 75.7  | 98.3                      | 4.4                     | 34.654      | 0.084                 |
| H                                                                                                       | 1000         | 2.597                           | 0.0058                          | 0.0558                                                  | 121.2                                          | 87.7  | 99.4                      | 11.1                    | 34.840      | 0.070                 |
| I                                                                                                       | 1075         | 2.584                           | 0.0057                          | 0.0497                                                  | 146.1                                          | 90.2  | 99.4                      | 19.3                    | 34.686      | 0.085                 |
| J                                                                                                       | 1150         | 2.586                           | 0.0054                          | 0.0454                                                  | 197.5                                          | 94.1  | 99.5                      | 30.3                    | 34.727      | 0.078                 |
| K                                                                                                       | 1200         | 2.586                           | 0.0054                          | 0.0981                                                  | 127.4                                          | 94.9  | 98.9                      | 37.4                    | 34.519      | 0.071                 |
| L                                                                                                       | 1250         | 2.578                           | 0.0054                          | 0.0587                                                  | 158.5                                          | 95.0  | 99.3                      | 46.2                    | 34.571      | 0.066                 |
| M                                                                                                       | 1300         | 2.584                           | 0.0052                          | 0.0381                                                  | 244.3                                          | 97.3  | 99.6                      | 59.8                    | 34.738      | 0.074                 |
| # N                                                                                                     | 1400         | 2.600                           | 0.0052                          | 0.0218                                                  | 520.4                                          | 98.8  | 99.8                      | 88.8                    | 35.011      | 0.072                 |
| # O                                                                                                     | 1650         | 2.676                           | 0.0056                          | 0.1642                                                  | 201.6                                          | 91.4  | 98.2                      | 100.0                   | 35.471      | 0.079                 |
| <b>TGA <math>\pm 1\sigma</math></b>                                                                     |              |                                 | n=10                            |                                                         | 1795.6                                         |       | K2O=9.28 %                |                         | 34.869      | 0.067                 |
| <b>Plateau <math>\pm 1\sigma</math></b>                                                                 |              | steps F-M                       | n=8                             | MSWD=2.01                                               | 1073.5                                         | 91.6  |                           | 59.8                    | 34.67       | 0.05                  |
| <b>JM-coarse Biotite, 2.77 mg, J=0.0078027, D=1.00361<math>\pm</math>0.00157, NM-100, Lab#=9912-01</b>  |              |                                 |                                 |                                                         |                                                |       |                           |                         |             |                       |
| # B                                                                                                     | 730          | 13.54                           | 0.1101                          | 10.63                                                   | 9.49                                           | 4.6   | 76.8                      | 2.2                     | 140.5       | 1.2                   |
| C                                                                                                       | 800          | 11.86                           | 0.0140                          | 1.863                                                   | 35.82                                          | 36.5  | 95.4                      | 10.6                    | 152.17      | 0.48                  |
| D                                                                                                       | 870          | 11.43                           | 0.0033                          | 0.3904                                                  | 94.8                                           | 153.9 | 99.0                      | 32.7                    | 152.31      | 0.46                  |
| E                                                                                                       | 950          | 11.40                           | 0.0048                          | 0.2238                                                  | 76.7                                           | 107.4 | 99.4                      | 50.6                    | 152.59      | 0.38                  |
| F                                                                                                       | 1000         | 11.43                           | 0.0169                          | 0.3452                                                  | 29.50                                          | 30.2  | 99.1                      | 57.5                    | 152.44      | 0.42                  |
| G                                                                                                       | 1075         | 11.35                           | 0.0286                          | 0.3961                                                  | 46.8                                           | 17.8  | 99.0                      | 68.4                    | 151.19      | 0.37                  |
| H                                                                                                       | 1250         | 11.43                           | 0.0557                          | 0.3363                                                  | 119.7                                          | 9.2   | 99.2                      | 96.4                    | 152.56      | 0.38                  |
| I                                                                                                       | 1350         | 12.89                           | 0.6914                          | 5.296                                                   | 15.56                                          | 0.74  | 88.3                      | 100.0                   | 153.26      | 0.74                  |
| <b>TGA <math>\pm 1\sigma</math></b>                                                                     |              |                                 | n=8                             |                                                         | 428.4                                          |       | K2O=7.61 %                |                         | 152.08      | 0.32                  |
| <b>Plateau <math>\pm 1\sigma</math></b>                                                                 |              | steps C-I                       | n=7                             | MSWD=1.99                                               | 418.9                                          | 64.4  |                           | 97.8                    | 152.24      | 0.26                  |

Appendix D, Table 1. Argon isotopic data.

| ID                                                                                  | Temp<br>(°C) | <sup>40</sup> Ar/ <sup>39</sup> Ar | <sup>37</sup> Ar/ <sup>39</sup> Ar | <sup>36</sup> Ar/ <sup>39</sup> Ar<br>(x 10 <sup>-3</sup> ) | <sup>39</sup> Ar <sub>K</sub><br>(x 10 <sup>-15</sup> mol) | K/Ca | <sup>40</sup> Ar*<br>(%) | <sup>39</sup> Ar<br>(%) | Age<br>(Ma) | ±1σ<br>(Ma) |
|-------------------------------------------------------------------------------------|--------------|------------------------------------|------------------------------------|-------------------------------------------------------------|------------------------------------------------------------|------|--------------------------|-------------------------|-------------|-------------|
| JM-Coarse K-feldspar, 14.24 mg, J=0.007788, D=1.00361±0.00157, NM-100, Lab#=9913-01 |              |                                    |                                    |                                                             |                                                            |      |                          |                         |             |             |
| A                                                                                   | 450          | 312.0                              | 0.0331                             | 28.99                                                       | 4.21                                                       | 15.4 | 97.3                     | 0.2                     | 2188.1      | 3.7         |
| B                                                                                   | 450          | 7.912                              | 0.0089                             | 2.521                                                       | 1.101                                                      | 57.4 | 90.6                     | 0.3                     | 97.6        | 2.2         |
| C                                                                                   | 500          | 18.30                              | 0.0148                             | 1.543                                                       | 5.02                                                       | 34.4 | 97.5                     | 0.6                     | 234.49      | 0.73        |
| D                                                                                   | 500          | 5.459                              | 0.0143                             | 1.099                                                       | 3.34                                                       | 35.6 | 94.0                     | 0.7                     | 70.38       | 0.81        |
| E                                                                                   | 550          | 34.39                              | 0.0154                             | 1.996                                                       | 15.41                                                      | 33.1 | 98.3                     | 1.6                     | 421.31      | 0.82        |
| F                                                                                   | 550          | 4.466                              | 0.0336                             | 1.236                                                       | 6.96                                                       | 15.2 | 91.8                     | 1.9                     | 56.37       | 0.28        |
| G                                                                                   | 600          | 16.01                              | 0.0399                             | 1.356                                                       | 19.3                                                       | 12.8 | 97.5                     | 3.0                     | 206.66      | 0.41        |
| H                                                                                   | 600          | 4.047                              | 0.0591                             | 1.058                                                       | 9.80                                                       | 8.6  | 92.3                     | 3.5                     | 51.41       | 0.26        |
| I                                                                                   | 650          | 9.282                              | 0.0605                             | 0.8432                                                      | 20.0                                                       | 8.4  | 97.4                     | 4.5                     | 122.36      | 0.26        |
| J                                                                                   | 650          | 4.077                              | 0.0709                             | 0.9930                                                      | 12.22                                                      | 7.2  | 92.9                     | 5.2                     | 52.09       | 0.22        |
| K                                                                                   | 700          | 6.622                              | 0.0695                             | 0.6828                                                      | 20.8                                                       | 7.3  | 97.0                     | 6.3                     | 87.73       | 0.21        |
| L                                                                                   | 700          | 4.281                              | 0.0678                             | 0.8728                                                      | 13.99                                                      | 7.5  | 94.1                     | 7.0                     | 55.36       | 0.20        |
| M                                                                                   | 750          | 6.240                              | 0.0644                             | 0.9879                                                      | 8.90                                                       | 7.9  | 95.4                     | 7.5                     | 81.40       | 0.29        |
| N                                                                                   | 800          | 6.905                              | 0.0676                             | 0.5824                                                      | 24.26                                                      | 7.5  | 97.6                     | 8.8                     | 91.91       | 0.22        |
| O                                                                                   | 850          | 5.730                              | 0.0590                             | 0.3675                                                      | 35.98                                                      | 8.6  | 98.2                     | 10.7                    | 77.00       | 0.17        |
| P                                                                                   | 900          | 5.242                              | 0.0649                             | 0.3073                                                      | 45.5                                                       | 7.9  | 98.4                     | 13.2                    | 70.67       | 0.16        |
| Q                                                                                   | 950          | 6.134                              | 0.0738                             | 2.920                                                       | 49.6                                                       | 6.9  | 86.0                     | 15.8                    | 72.30       | 0.25        |
| R                                                                                   | 1000         | 6.161                              | 0.0674                             | 0.7217                                                      | 51.9                                                       | 7.6  | 96.6                     | 18.6                    | 81.39       | 0.19        |
| S                                                                                   | 1050         | 7.148                              | 0.0474                             | 0.3319                                                      | 58.5                                                       | 10.8 | 98.7                     | 21.7                    | 96.11       | 0.22        |
| T                                                                                   | 1100         | 8.676                              | 0.0270                             | 0.3747                                                      | 73.7                                                       | 18.9 | 98.7                     | 25.6                    | 116.17      | 0.26        |
| U                                                                                   | 1100         | 8.951                              | 0.0165                             | 0.4027                                                      | 120.3                                                      | 30.9 | 98.7                     | 32.0                    | 119.67      | 0.25        |
| V                                                                                   | 1100         | 9.257                              | 0.0138                             | 0.4799                                                      | 139.7                                                      | 36.9 | 98.5                     | 39.5                    | 123.39      | 0.25        |
| W                                                                                   | 1100         | 9.638                              | 0.0141                             | 0.7734                                                      | 153.0                                                      | 36.3 | 97.6                     | 47.7                    | 127.24      | 0.26        |
| X                                                                                   | 1100         | 10.40                              | 0.0152                             | 0.9366                                                      | 148.8                                                      | 33.7 | 97.3                     | 55.6                    | 136.61      | 0.36        |
| Y                                                                                   | 1100         | 11.44                              | 0.0168                             | 1.469                                                       | 147.4                                                      | 30.3 | 96.2                     | 63.5                    | 148.01      | 0.29        |
| Z                                                                                   | 1230         | 11.90                              | 0.0237                             | 0.4127                                                      | 52.7                                                       | 21.6 | 99.0                     | 66.3                    | 158.00      | 0.31        |
| ZA                                                                                  | 1280         | 11.49                              | 0.0183                             | 0.2172                                                      | 159.8                                                      | 27.9 | 99.5                     | 74.8                    | 153.50      | 0.50        |
| ZB                                                                                  | 1330         | 11.42                              | 0.0111                             | 0.1393                                                      | 360.4                                                      | 45.9 | 99.6                     | 94.0                    | 152.86      | 0.35        |
| ZC                                                                                  | 1430         | 10.58                              | 0.1594                             | 0.4387                                                      | 70.7                                                       | 3.2  | 98.9                     | 97.8                    | 140.97      | 0.29        |
| ZD                                                                                  | 1530         | 10.43                              | 0.1401                             | 0.7143                                                      | 36.45                                                      | 3.6  | 98.1                     | 99.7                    | 137.93      | 0.32        |
| ZE                                                                                  | 1650         | 14.11                              | 0.1679                             | 9.826                                                       | 5.16                                                       | 3.0  | 79.5                     | 100.0                   | 150.83      | 0.74        |
| TGA ± 1σ                                                                            |              |                                    | n=31                               |                                                             | 1874.9                                                     |      | K2O=6.49 %               |                         | 140.78      | 0.27        |
| NB20 Fine Illite, 3.95 mg, J=0.0034782, D=1.00719±0.00168, nm-64, Lab#=7672-01      |              |                                    |                                    |                                                             |                                                            |      |                          |                         |             |             |
| B                                                                                   | 500          | 5.426                              | 0.0222                             | 3.388                                                       | 4.31                                                       | 23.0 | 81.5                     | 1.8                     | 27.41       | 0.61        |
| C                                                                                   | 550          | 13.93                              | 0.0214                             | 1.964                                                       | 10.03                                                      | 23.8 | 95.8                     | 6.1                     | 81.73       | 0.31        |
| E                                                                                   | 625          | 14.49                              | 0.1002                             | 0.6720                                                      | 27.19                                                      | 5.1  | 98.7                     | 17.8                    | 87.41       | 0.21        |
| F                                                                                   | 650          | 15.32                              | 0.0832                             | 0.3579                                                      | 25.67                                                      | 6.1  | 99.4                     | 28.8                    | 92.90       | 0.22        |
| G                                                                                   | 675          | 16.15                              | 0.0757                             | 0.2538                                                      | 43.7                                                       | 6.7  | 99.6                     | 47.4                    | 98.03       | 0.23        |
| H                                                                                   | 700          | 16.95                              | 0.0893                             | 0.2286                                                      | 53.9                                                       | 5.7  | 99.6                     | 70.5                    | 102.87      | 0.21        |
| I                                                                                   | 730          | 17.33                              | 0.0949                             | 0.2807                                                      | 48.2                                                       | 5.4  | 99.6                     | 91.2                    | 104.99      | 0.22        |
| J                                                                                   | 760          | 18.12                              | 0.0573                             | 0.4635                                                      | 7.99                                                       | 8.9  | 99.3                     | 94.6                    | 109.36      | 0.39        |
| K                                                                                   | 800          | 22.15                              | 0.0459                             | 0.9291                                                      | 8.42                                                       | 11.1 | 98.8                     | 98.2                    | 132.16      | 0.40        |
| L                                                                                   | 850          | 37.14                              | 0.1219                             | 3.260                                                       | 2.030                                                      | 4.2  | 97.4                     | 99.1                    | 213.8       | 1.2         |
| M                                                                                   | 950          | 42.56                              | 0.2346                             | 7.093                                                       | 1.172                                                      | 2.2  | 95.1                     | 99.6                    | 237.6       | 2.1         |
| N                                                                                   | 1250         | 23.39                              | 0.3898                             | 14.46                                                       | 1.015                                                      | 1.3  | 81.8                     | 100.0                   | 116.2       | 2.4         |
| TGA ± 1σ                                                                            |              |                                    | n=12                               |                                                             | 233.6                                                      |      | K2O=6.53 %               |                         | 100.30      | 0.21        |



Appendix D, Table 1. Argon isotopic data.

| ID                                                                                             | Temp<br>(°C) | <sup>40</sup> Ar/ <sup>39</sup> Ar | <sup>37</sup> Ar/ <sup>39</sup> Ar | <sup>36</sup> Ar/ <sup>39</sup> Ar<br>(x 10 <sup>-3</sup> ) | <sup>39</sup> Ar <sub>K</sub><br>(x 10 <sup>-15</sup> mol) | K/Ca | <sup>40</sup> Ar*<br>(%) | <sup>39</sup> Ar<br>(%) | Age<br>(Ma) | ±1σ<br>(Ma) |
|------------------------------------------------------------------------------------------------|--------------|------------------------------------|------------------------------------|-------------------------------------------------------------|------------------------------------------------------------|------|--------------------------|-------------------------|-------------|-------------|
| NB20 Coarse Illite, 3.52 mg, J=0.0035, D=1.00719±0.00168, nm-64, Lab#=7674-01                  |              |                                    |                                    |                                                             |                                                            |      |                          |                         |             |             |
| B                                                                                              | 500          | 9.379                              | 0.0117                             | 3.018                                                       | 6.17                                                       | 43.7 | 90.5                     | 2.8                     | 52.66       | 0.43        |
| C                                                                                              | 550          | 15.46                              | 0.0106                             | 1.554                                                       | 7.81                                                       | 48.0 | 97.0                     | 6.3                     | 92.15       | 0.36        |
| D                                                                                              | 600          | 14.75                              | 0.0101                             | 0.4704                                                      | 14.65                                                      | 50.5 | 99.1                     | 12.9                    | 89.85       | 0.26        |
| E                                                                                              | 625          | 15.62                              | 0.0104                             | 0.4446                                                      | 20.73                                                      | 48.8 | 99.2                     | 22.3                    | 95.10       | 0.25        |
| F                                                                                              | 650          | 16.04                              | 0.0101                             | 0.2153                                                      | 29.23                                                      | 50.5 | 99.6                     | 35.4                    | 98.01       | 0.21        |
| G                                                                                              | 675          | 16.36                              | 0.0097                             | 0.1624                                                      | 38.30                                                      | 52.8 | 99.7                     | 52.7                    | 100.05      | 0.24        |
| H                                                                                              | 700          | 16.84                              | 0.0090                             | 0.2020                                                      | 41.46                                                      | 56.4 | 99.6                     | 71.4                    | 102.83      | 0.23        |
| I                                                                                              | 730          | 17.59                              | 0.0087                             | 0.1848                                                      | 39.01                                                      | 58.4 | 99.7                     | 89.0                    | 107.31      | 0.23        |
| J                                                                                              | 760          | 20.85                              | 0.0091                             | 0.4129                                                      | 15.85                                                      | 56.1 | 99.4                     | 96.1                    | 126.21      | 0.31        |
| K                                                                                              | 800          | 29.05                              | 0.0091                             | 0.5130                                                      | 3.560                                                      | 56.3 | 99.5                     | 97.8                    | 173.67      | 0.74        |
| L                                                                                              | 850          | 49.10                              | 0.0134                             | 2.013                                                       | 3.673                                                      | 38.2 | 98.8                     | 99.4                    | 282.75      | 0.94        |
| M                                                                                              | 950          | 86.03                              | 0.0263                             | 8.198                                                       | 0.866                                                      | 19.4 | 97.2                     | 99.8                    | 463.0       | 3.1         |
| N                                                                                              | 1250         | 24.53                              | 0.0714                             | 43.72                                                       | 0.450                                                      | 7.1  | 47.3                     | 100.0                   | 71.8        | 5.5         |
| TGA ± 1σ                                                                                       |              |                                    | n=13                               |                                                             | 221.8                                                      |      | K2O=6.91 %               |                         | 106.65      | 0.22        |
| NB-20 Illite, In Vacuo irradiation, 3.75 mg, J=0.015, D=1.00535±0.00031, NM-140, Lab#=52520-02 |              |                                    |                                    |                                                             |                                                            |      |                          |                         |             |             |
| AA In Vacuo                                                                                    |              | 2.026                              | 0.0121                             | 6.719                                                       | 76.1                                                       | 42.3 | 1.0                      | 6.6                     | 0.57        | 0.23        |
| A                                                                                              | 550          | 3.406                              | 0.0122                             | 0.3542                                                      | 265.5                                                      | 41.8 | 96.9                     | 29.8                    | 86.677      | 0.091       |
| B                                                                                              | 600          | 3.867                              | 0.0112                             | 0.0490                                                      | 312.6                                                      | 45.6 | 99.6                     | 57.2                    | 100.85      | 0.11        |
| C                                                                                              | 650          | 4.081                              | 0.0100                             | 0.0581                                                      | 310.0                                                      | 50.9 | 99.6                     | 84.2                    | 106.23      | 0.13        |
| D                                                                                              | 675          | 4.567                              | 0.0100                             | 0.0741                                                      | 117.2                                                      | 51.2 | 99.5                     | 94.5                    | 118.47      | 0.15        |
| E                                                                                              | 700          | 6.109                              | 0.0100                             | 0.1315                                                      | 43.0                                                       | 51.0 | 99.4                     | 98.2                    | 156.72      | 0.25        |
| F                                                                                              | 730          | 9.327                              | 0.0109                             | 0.2394                                                      | 14.29                                                      | 46.9 | 99.2                     | 99.5                    | 234.08      | 0.50        |
| G                                                                                              | 760          | 13.93                              | 0.0134                             | 0.5688                                                      | 5.98                                                       | 38.1 | 98.8                     | 100.0                   | 338.09      | 0.88        |
| TGA ± 1σ                                                                                       |              |                                    | n=8                                |                                                             | 1144.7                                                     |      | K2O=7.82 %               |                         | 99.55       | 0.12        |
| NB19 Illite 4.07 mg, J=0.0034297, D=1.00719±0.00168, nm-64, Lab#=7676-01                       |              |                                    |                                    |                                                             |                                                            |      |                          |                         |             |             |
| B                                                                                              | 500          | 8.202                              | 0.0317                             | 8.626                                                       | 6.03                                                       | 16.1 | 68.9                     | 3.8                     | 34.50       | 0.48        |
| C                                                                                              | 550          | 12.70                              | 0.0283                             | 3.831                                                       | 10.09                                                      | 18.0 | 91.1                     | 10.1                    | 70.04       | 0.32        |
| D                                                                                              | 600          | 13.59                              | 0.0188                             | -4.4524                                                     | 0.392                                                      | 27.1 | 109.7                    | 10.4                    | 89.8        | 5.8         |
| E                                                                                              | 625          | 17.95                              | 0.0269                             | 0.8412                                                      | 33.69                                                      | 19.0 | 98.6                     | 31.6                    | 106.21      | 0.23        |
| F                                                                                              | 650          | 19.99                              | 0.0265                             | 0.4759                                                      | 21.44                                                      | 19.3 | 99.3                     | 45.0                    | 118.71      | 0.27        |
| G                                                                                              | 675          | 21.61                              | 0.0259                             | 0.4778                                                      | 23.22                                                      | 19.7 | 99.4                     | 59.6                    | 128.05      | 0.29        |
| H                                                                                              | 700          | 24.71                              | 0.0250                             | 0.5383                                                      | 20.12                                                      | 20.4 | 99.4                     | 72.3                    | 145.73      | 0.34        |
| I                                                                                              | 730          | 30.20                              | 0.0243                             | 0.6925                                                      | 16.68                                                      | 21.0 | 99.3                     | 82.8                    | 176.54      | 0.48        |
| J                                                                                              | 760          | 37.36                              | 0.0244                             | 0.9965                                                      | 10.31                                                      | 20.9 | 99.2                     | 89.2                    | 215.75      | 0.48        |
| K                                                                                              | 800          | 42.99                              | 0.0254                             | 1.366                                                       | 4.34                                                       | 20.1 | 99.1                     | 92.0                    | 245.84      | 0.76        |
| L                                                                                              | 850          | 52.59                              | 0.0283                             | 1.424                                                       | 5.97                                                       | 18.0 | 99.2                     | 95.7                    | 296.85      | 0.75        |
| M                                                                                              | 950          | 53.42                              | 0.0435                             | 5.091                                                       | 2.679                                                      | 11.7 | 97.2                     | 97.4                    | 295.5       | 1.1         |
| N                                                                                              | 1250         | 5.126                              | 0.0681                             | 3.327                                                       | 4.139                                                      | 7.5  | 80.8                     | 100.0                   | 25.34       | 0.61        |
| TGA ± 1σ                                                                                       |              |                                    | n=13                               |                                                             | 159.1                                                      |      | K2O=4.38 %               |                         | 138.54      | 0.28        |

Appendix D, Table 1. Argon isotopic data.

| ID                                                                                              | Temp<br>(°C) | <sup>40</sup> Ar/ <sup>39</sup> Ar | <sup>37</sup> Ar/ <sup>39</sup> Ar | <sup>36</sup> Ar/ <sup>39</sup> Ar<br>(x 10 <sup>-3</sup> ) | <sup>39</sup> Ar <sub>K</sub><br>(x 10 <sup>-15</sup> mol) | K/Ca  | <sup>40</sup> Ar*<br>(%) | <sup>39</sup> Ar<br>(%) | Age<br>(Ma) | ±1σ<br>(Ma) |
|-------------------------------------------------------------------------------------------------|--------------|------------------------------------|------------------------------------|-------------------------------------------------------------|------------------------------------------------------------|-------|--------------------------|-------------------------|-------------|-------------|
| NB-59 Illite, 10.64 mg, J=0.0037063, D=1.0019±0.001, NM-80, Lab#=8602-01                        |              |                                    |                                    |                                                             |                                                            |       |                          |                         |             |             |
| B                                                                                               | 500          | 6.986                              | 0.0054                             | 3.780                                                       | 14.45                                                      | 95.2  | 84.0                     | 1.8                     | 38.69       | 0.17        |
| C                                                                                               | 550          | 17.14                              | 0.0061                             | 2.270                                                       | 14.11                                                      | 83.8  | 96.1                     | 3.6                     | 106.77      | 0.19        |
| D                                                                                               | 600          | 14.43                              | 0.0072                             | 1.240                                                       | 5.60                                                       | 70.7  | 97.5                     | 4.3                     | 91.51       | 0.28        |
| E                                                                                               | 625          | 15.41                              | 0.0048                             | 0.7376                                                      | 49.7                                                       | 106.5 | 98.6                     | 10.5                    | 98.71       | 0.18        |
| F                                                                                               | 650          | 16.01                              | 0.0062                             | 0.6135                                                      | 66.0                                                       | 82.8  | 98.9                     | 18.7                    | 102.75      | 0.17        |
| G                                                                                               | 675          | 16.36                              | 0.0059                             | 0.5560                                                      | 89.9                                                       | 86.5  | 99.0                     | 30.0                    | 105.05      | 0.17        |
| H                                                                                               | 700          | 16.71                              | 0.0046                             | 0.5890                                                      | 109.8                                                      | 111.6 | 99.0                     | 43.7                    | 107.21      | 0.27        |
| I                                                                                               | 740          | 17.21                              | 0.0041                             | 0.6749                                                      | 160.1                                                      | 123.2 | 98.8                     | 63.7                    | 110.20      | 0.20        |
| J                                                                                               | 780          | 19.88                              | 0.0039                             | 0.8429                                                      | 142.1                                                      | 131.2 | 98.7                     | 81.4                    | 126.56      | 0.28        |
| K                                                                                               | 800          | 28.88                              | 0.0041                             | 1.836                                                       | 58.3                                                       | 124.8 | 98.1                     | 88.7                    | 180.03      | 0.31        |
| L                                                                                               | 850          | 47.04                              | 0.0042                             | 2.302                                                       | 39.1                                                       | 121.7 | 98.6                     | 93.6                    | 285.95      | 0.55        |
| M                                                                                               | 900          | 72.48                              | 0.0064                             | 3.489                                                       | 16.31                                                      | 80.2  | 98.6                     | 95.6                    | 423.73      | 0.76        |
| N                                                                                               | 1000         | 64.71                              | 0.0473                             | 4.012                                                       | 13.00                                                      | 10.8  | 98.2                     | 97.3                    | 381.35      | 0.69        |
| O                                                                                               | 1650         | 5.729                              | 0.0186                             | 4.769                                                       | 21.9                                                       | 27.4  | 75.3                     | 100.0                   | 28.53       | 0.16        |
| TGA ± 1σ                                                                                        |              |                                    | n=14                               |                                                             | 800.4                                                      |       | K2O=7.80 %               |                         | 132.94      | 0.20        |
| NB-087 Illite, In Vacuo irradiation, 3.73 mg, J=0.015, D=1.00535±0.00031, NM-140, Lab#=52524-02 |              |                                    |                                    |                                                             |                                                            |       |                          |                         |             |             |
| AA In Vacuo                                                                                     |              | 3.419                              | 0.0083                             | 11.37                                                       | 48.4                                                       | 61.3  | 1.1                      | 6.8                     | 1.01        | 0.34        |
| A                                                                                               | 550          | 3.525                              | 0.0061                             | 0.5107                                                      | 114.7                                                      | 83.8  | 95.7                     | 23.0                    | 88.55       | 0.12        |
| B                                                                                               | 600          | 3.942                              | 0.0056                             | 0.0522                                                      | 132.8                                                      | 91.0  | 99.6                     | 41.8                    | 102.73      | 0.13        |
| C                                                                                               | 650          | 4.187                              | 0.0055                             | 0.0514                                                      | 143.1                                                      | 92.5  | 99.6                     | 62.0                    | 108.97      | 0.16        |
| D                                                                                               | 675          | 4.824                              | 0.0049                             | 0.0778                                                      | 84.0                                                       | 105.1 | 99.5                     | 73.9                    | 124.93      | 0.18        |
| E                                                                                               | 700          | 6.277                              | 0.0048                             | 0.1662                                                      | 43.1                                                       | 105.5 | 99.2                     | 79.9                    | 160.61      | 0.23        |
| F                                                                                               | 730          | 8.560                              | 0.0047                             | 0.2159                                                      | 33.82                                                      | 107.9 | 99.3                     | 84.7                    | 215.90      | 0.35        |
| G                                                                                               | 760          | 11.44                              | 0.0050                             | 0.2158                                                      | 21.62                                                      | 102.9 | 99.4                     | 87.8                    | 283.68      | 0.40        |
| H                                                                                               | 800          | 14.78                              | 0.0053                             | 0.2841                                                      | 18.83                                                      | 96.1  | 99.4                     | 90.4                    | 359.02      | 0.56        |
| I                                                                                               | 840          | 17.12                              | 0.0063                             | 0.2560                                                      | 11.51                                                      | 81.4  | 99.6                     | 92.0                    | 410.23      | 0.59        |
| J                                                                                               | 860          | 17.57                              | 0.0077                             | 0.3640                                                      | 6.98                                                       | 66.3  | 99.4                     | 93.0                    | 419.30      | 0.86        |
| K                                                                                               | 900          | 16.39                              | 0.0102                             | 0.2638                                                      | 6.58                                                       | 49.8  | 99.5                     | 94.0                    | 394.53      | 0.90        |
| L                                                                                               | 1000         | 14.30                              | 0.0146                             | 0.3891                                                      | 12.69                                                      | 35.1  | 99.2                     | 95.8                    | 347.48      | 0.56        |
| M                                                                                               | 1200         | 6.850                              | 0.0179                             | 0.7659                                                      | 18.86                                                      | 28.4  | 96.7                     | 98.4                    | 170.41      | 0.36        |
| N                                                                                               | 1750         | 3.722                              | 0.0292                             | 3.624                                                       | 11.20                                                      | 17.5  | 71.1                     | 100.0                   | 69.86       | 0.65        |
| TGA ± 1σ                                                                                        |              |                                    | n=15                               |                                                             | 708.2                                                      |       | K2O=4.86 %               |                         | 137.37      | 0.16        |

Appendix D, Table 1. Argon isotopic data.

| ID                                                                                                  | Temp<br>(°C) | $^{40}\text{Ar}/^{39}\text{Ar}$ | $^{37}\text{Ar}/^{39}\text{Ar}$ | $^{36}\text{Ar}/^{39}\text{Ar}$<br>( $\times 10^{-3}$ ) | $^{39}\text{Ar}_K$<br>( $\times 10^{-15}$ mol) | K/Ca | $^{40}\text{Ar}^*$<br>(%) | $^{39}\text{Ar}$<br>(%) | Age<br>(Ma) | $\pm 1\sigma$<br>(Ma) |
|-----------------------------------------------------------------------------------------------------|--------------|---------------------------------|---------------------------------|---------------------------------------------------------|------------------------------------------------|------|---------------------------|-------------------------|-------------|-----------------------|
| <b>NB-102 Sericite, 5.71 mg, J=0.0039223, D=1.00362<math>\pm</math>0.00105, NM-95, Lab#=9574-01</b> |              |                                 |                                 |                                                         |                                                |      |                           |                         |             |                       |
| A                                                                                                   | 600          | 25.59                           | 0.0279                          | 33.45                                                   | 5.50                                           | 18.3 | 61.3                      | 11.9                    | 107.71      | 0.84                  |
| B                                                                                                   | 630          | 16.64                           | 0.0183                          | 2.594                                                   | 6.05                                           | 27.8 | 95.4                      | 25.0                    | 108.79      | 0.52                  |
| C                                                                                                   | 660          | 15.96                           | 0.0126                          | 0.8573                                                  | 4.77                                           | 40.3 | 98.4                      | 35.4                    | 107.68      | 0.62                  |
| D                                                                                                   | 690          | 15.47                           | 0.0092                          | 0.8151                                                  | 3.078                                          | 55.4 | 98.4                      | 42.0                    | 104.50      | 0.92                  |
| E                                                                                                   | 720          | 15.05                           | 0.0104                          | 0.8741                                                  | 5.58                                           | 49.0 | 98.3                      | 54.1                    | 101.56      | 0.54                  |
| F                                                                                                   | 750          | 14.64                           | 0.0164                          | 1.100                                                   | 5.00                                           | 31.1 | 97.8                      | 65.0                    | 98.38       | 0.61                  |
| G                                                                                                   | 780          | 14.15                           | 0.0247                          | 0.8151                                                  | 4.51                                           | 20.6 | 98.3                      | 74.7                    | 95.70       | 0.67                  |
| H                                                                                                   | 810          | 13.77                           | 0.0338                          | 0.8174                                                  | 2.947                                          | 15.1 | 98.3                      | 81.1                    | 93.14       | 0.99                  |
| I                                                                                                   | 840          | 13.28                           | 0.0401                          | 0.9154                                                  | 1.207                                          | 12.7 | 98.0                      | 83.7                    | 89.7        | 2.4                   |
| J                                                                                                   | 870          | 12.92                           | 0.0528                          | 0.0123                                                  | 0.806                                          | 9.7  | 100.0                     | 85.5                    | 89.0        | 3.7                   |
| K                                                                                                   | 900          | 11.90                           | 0.0559                          | 0.4717                                                  | 0.460                                          | 9.1  | 98.9                      | 86.5                    | 81.2        | 6.4                   |
| L                                                                                                   | 1000         | 9.373                           | 0.0739                          | 3.602                                                   | 0.844                                          | 6.9  | 88.7                      | 88.3                    | 57.7        | 3.6                   |
| M                                                                                                   | 1100         | 6.075                           | 0.0901                          | 5.187                                                   | 1.129                                          | 5.7  | 74.8                      | 90.7                    | 31.7        | 2.8                   |
| N                                                                                                   | 1200         | 4.227                           | 0.0828                          | 6.170                                                   | 0.941                                          | 6.2  | 56.8                      | 92.8                    | 16.8        | 3.4                   |
| O                                                                                                   | 1300         | 4.426                           | 0.0922                          | 10.26                                                   | 1.096                                          | 5.5  | 31.3                      | 95.2                    | 9.7         | 3.0                   |
| P                                                                                                   | 1650         | 11.76                           | 0.1576                          | 25.52                                                   | 2.233                                          | 3.2  | 35.9                      | 100.0                   | 29.5        | 1.6                   |
| <b>TGA <math>\pm 1\sigma</math></b>                                                                 |              |                                 | n=16                            |                                                         | 46.2                                           |      | K2O=0.79 %                |                         | 92.17       | 0.32                  |

Isotopic ratios corrected for blank, radioactive decay, and mass discrimination, not corrected for interfering reactions.

Ages calculated relative to FC-2 Fish Canyon Tuff sanidine interlaboratory standard at 27.84 Ma.

Errors quoted for individual analyses include analytical error only, without interfering reaction or J uncertainties.

TGA=Total gas age: Calculated by summing isotopic measurements of all steps.

TGA error calculated by quadratically combining errors of isotopic measurements of all steps.

Plateau age is inverse-variance-weighted mean of selected steps.

Plateau age error is inverse-variance-weighted mean error (Taylor, 1982) times square root MSWD where MSWD>1.

Plateau and TGAs incorporate uncertainties in interfering reaction corrections and J factors.

Decay constants and isotopic abundances after Steiger and Jäger (1977).

# symbol preceding sample ID denotes analyses excluded from plateau age calculations.

K<sub>2</sub>O estimated from sample weight,  $^{39}\text{Ar}$  signal, J-factor and mass spectrometer sensitivity.

D= Discrimination (1 AMU) in favor of light isotopes.
